# Supplementary material for: Risk Factors of Malnutrition among In-School Children and Adolescents in Developing Countries: A Scoping Review
Source: MDPI journal article supplement (doi:10.3390/children11040476), 2024-04-15
Supplement: s1 [file s1]

**Table S1.** Data extracted from studies included.

| Authors,<br>Year and<br>Country | Purpose of<br>the Study                                                                                                                                                                                                                                                                                                             | Study<br>Design        | Population                             | Sample<br>Size | Risk Factors                                                                                                                        | Health Impact                                                                                                | Impact on School<br>Performance and<br>Attendance |
|---------------------------------|-------------------------------------------------------------------------------------------------------------------------------------------------------------------------------------------------------------------------------------------------------------------------------------------------------------------------------------|------------------------|----------------------------------------|----------------|-------------------------------------------------------------------------------------------------------------------------------------|--------------------------------------------------------------------------------------------------------------|---------------------------------------------------|
| [29]<br>India                   | To estimate the prevalence of malnutrition among school-going adolescent children.<br>To assess the correlation between nutritional status of adolescent children and their parents' literacy level and socio-economic class.                                                                                                       | Cross-sectional        | Among school-going adolescent children | 1000           | Children whose mothers and fathers were illiterate.<br>Low socio-economic status of the parents.                                    |                                                                                                              |                                                   |
| [13]<br>Bangladesh              | This study focused on investigating the extent of malnutrition, including individual-level double burden and associated factors influencing malnutrition amid school-going adolescents of Bangladesh using 2014 Bangladesh GSHS survey data. And examined individual-level double burden (coexistence of stunting and overweight at | Cross-sectional survey | School-going adolescents               | 2989           | Adolescents who consume regular carbonated soft drink, adolescents who consume regular fast food, households without food security. | Poverty, poor maternal health, recurring illness, risk of Small for Gestational Age (SGA) and preterm birth. |                                                   |

|                    |                                                                                                                       |                        |                         |     |                                                                                                                                                                                                                                                        |                                                                                                                                                                                                           |                                                                                                                                                                     |
|--------------------|-----------------------------------------------------------------------------------------------------------------------|------------------------|-------------------------|-----|--------------------------------------------------------------------------------------------------------------------------------------------------------------------------------------------------------------------------------------------------------|-----------------------------------------------------------------------------------------------------------------------------------------------------------------------------------------------------------|---------------------------------------------------------------------------------------------------------------------------------------------------------------------|
|                    | individual level).                                                                                                    |                        |                         |     |                                                                                                                                                                                                                                                        |                                                                                                                                                                                                           |                                                                                                                                                                     |
| [16]<br>Bangladesh | To assess the prevalence of malnutrition among primary school-going children and its associated factors.              | Cross-sectional survey | Primary school children | 400 | Poor breast-feeding practices, low total family income, unsafe drinking water. The age at which the child starts complementary foods, Large family size, parents who depend on agricultural land.                                                      | Gender discrimination (where boys are given higher importance than girls) leads to the boys receiving more nutrition and proper care than girls.                                                          |                                                                                                                                                                     |
| [17]<br>Ethiopia   | The aim of this study was to assess nutritional status and associated factors among school adolescents in Chiro town. | Cross-sectional study  | School adolescent       | 291 | Inadequate dietary intake of adolescent, adolescents who consumed diet of low diversity, being younger due inadequate income, adolescents who come from male-headed household, and low educational status affect income and knowledge about nutrition. |                                                                                                                                                                                                           |                                                                                                                                                                     |
| [18]<br>India      | To assess the nutritional status of school-going children in a village.                                               | Cross-sectional survey | School-going children   | 600 | Children who come from weak socio-economic background, children who live in flood areas.                                                                                                                                                               | Vitamin A deficiency was noted as the cause of night blindness, conjunctival, xerosis, and corneal xerosis. Vitamin B-complex deficiency was noted as the cause of angular stomatitis, glossitis and iron | Poor learning ability and reduced work efficiency. It affects intellectual development. It increases the chances of children becoming poor reader and poor writers. |

|               |                                                                                                                                                                                    |                       |                                       |      |                                                                                                                                                                                                                                                               |                                                                                                                                                                                                                                                                                                                            |
|---------------|------------------------------------------------------------------------------------------------------------------------------------------------------------------------------------|-----------------------|---------------------------------------|------|---------------------------------------------------------------------------------------------------------------------------------------------------------------------------------------------------------------------------------------------------------------|----------------------------------------------------------------------------------------------------------------------------------------------------------------------------------------------------------------------------------------------------------------------------------------------------------------------------|
|               |                                                                                                                                                                                    |                       |                                       |      |                                                                                                                                                                                                                                                               | deficiency were noted as the causes of anemia in children.                                                                                                                                                                                                                                                                 |
| [19]<br>India | To find out the prevalence of vitamin A deficiency (VAD) among school-going children aged 6–12 years and to assess the nutritional status of these selected school-going children. |                       | School-going children aged 6–12 years | 30   | Children belonging to lower socioeconomic class are prone to malnutrition.                                                                                                                                                                                    | Exhibition of conjunctival xerosis, night blindness.                                                                                                                                                                                                                                                                       |
| [20]<br>Kenya | To determine the level of nutrition knowledge, attitude and practices and nutritional status of school-going children in a semi-arid food-insecure region.                         | Cross-sectional study | School-going children                 | 350  | Children who drop out of school were at risk due to lacking nutritional education, children with low consumption of high-quality protein. Children of parents with low-ranking occupation status were at risk; causal labor livelihood among most households. | Poor sanitation leading to disease prevalence examples ; the most common diseases among school children were malaria, headaches, nose bleeding, fainting, stomachache and diseases of the Upper Respiratory Infections (URI). Others were skin infections, worm infestations, pneumonia and wounds that took long to heal. |
| [21]<br>India | To assess the prevalence and certain socio-economic and demographic factors affecting the double burden of malnutrition                                                            | Cross-sectional study | Urban school-going children           | 1017 | Low-income level of household, low standard of education of mothers, large family size.                                                                                                                                                                       | Acceleration of preventable, non-communicable diseases and higher prevalence of overweight–obesity and slightly lower prevalence of under nutrition.                                                                                                                                                                       |

|                   |                                                                                                                   |                                   |                             |     |                                                                                                                                                                                                  |                                                                                            |                                                                                                                                                                                             |
|-------------------|-------------------------------------------------------------------------------------------------------------------|-----------------------------------|-----------------------------|-----|--------------------------------------------------------------------------------------------------------------------------------------------------------------------------------------------------|--------------------------------------------------------------------------------------------|---------------------------------------------------------------------------------------------------------------------------------------------------------------------------------------------|
|                   | among urban children.                                                                                             |                                   |                             |     |                                                                                                                                                                                                  |                                                                                            |                                                                                                                                                                                             |
| [22]<br>Burkina   | To assess the nutritional status of schoolchildren attending public and private schools.                          | Cross-sectional study             | School-going children       | 649 | Children whose parents are poor or of lower-income families are at risk; iron deficiency in children.                                                                                            | Micronutrient malnutrition, namely anemia and vitamin A deficiency, were highly prevalent. | It was observed that several school-going children stayed at school during lunchtime, but did not have pocket money to buy any street food, or did not have enough to eat an adequate meal. |
| [23]<br>Mauritius | To determine whether specific socio-economic factors were associated with poor nutritional status among children. | Cross-sectional survey            | School-going children       | 240 | Parents who had low level of education, including poor nutrition knowledge, leading children to be at risk.<br>Families who are poor cannot afford expensive food commodities to their children. |                                                                                            |                                                                                                                                                                                             |
| [24]<br>Kenya     | To assess the nutritional status and associated factors among school-going children.                              | Descriptive cross-sectional study | Among school-going children | 315 | Children who live in large-size households.<br>Children who come from low-income households.<br>Poor knowledge of mothers about a child's nutrition.                                             |                                                                                            |                                                                                                                                                                                             |
| [25]<br>Nigeria   | To determine if differences exist between them and providing a baseline data for the                              | Cross-sectional study             | Young school children       | 415 | Children in public schools were at risk due to the socio-economic background, types of food                                                                                                      |                                                                                            |                                                                                                                                                                                             |

|                  |                                                                                                                                                   |                       |                               |     |                                                                                                                                                                                                                                                                                                                       |                                                                                                                                                |                                                                                                                                                                                         |
|------------------|---------------------------------------------------------------------------------------------------------------------------------------------------|-----------------------|-------------------------------|-----|-----------------------------------------------------------------------------------------------------------------------------------------------------------------------------------------------------------------------------------------------------------------------------------------------------------------------|------------------------------------------------------------------------------------------------------------------------------------------------|-----------------------------------------------------------------------------------------------------------------------------------------------------------------------------------------|
|                  | state in this regard.                                                                                                                             |                       |                               |     | common in the environment and storage and preparation modalities, and the general environmental factors that pervade the state.                                                                                                                                                                                       |                                                                                                                                                |                                                                                                                                                                                         |
| [26]<br>Nigeria  | To compare the nutritional status of public primary school children in an upland and a riverine area of Ojo Local Government Area of Lagos State. | Cross-sectional study | School children               | 240 | Children of others of low-income status and mothers who had little or no formal education were at risk.<br>Children whose mothers have low socioeconomic status and those living in poor environmental conditions were at risk.                                                                                       |                                                                                                                                                |                                                                                                                                                                                         |
| [27]<br>Ethiopia | To identifying the level of malnutrition and associated factors among high school adolescents.                                                    | Cross-sectional study | School-going adolescent girls | 726 | Families with low income were at risk of stunting, families with better socioeconomic status were also at risk of obesity, families whose children take inadequate energy-rich food were also at risk.<br>Adolescents of fathers from lower levels of education had a significantly higher risk of being underweight. | It is known that short stature is associated with cephalopelvic disproportion and increased risk of maternal complications during child birth. | Stunting was associated with delayed school entry, repetition and dropout rates, as well as decreased graduation rates from primary and secondary school, and lower school performance. |

|               |                                                                                                                                                       |                             |                              |      |                                                                                                                                                                                                                                      |                                                                                                                                                                                                             |
|---------------|-------------------------------------------------------------------------------------------------------------------------------------------------------|-----------------------------|------------------------------|------|--------------------------------------------------------------------------------------------------------------------------------------------------------------------------------------------------------------------------------------|-------------------------------------------------------------------------------------------------------------------------------------------------------------------------------------------------------------|
| [28]<br>India | To evaluate the socio-economic and demographic determinants among school-going children belonging to the Rajbanshi population of North Bengal, India. | Cross-sectional study       | Among school-going children  | 350  | Children living in poverty, poor socio-economic status and rural environments were at risk of undernutrition, while those residing in urban environments and a higher socio-economic status were associated with overweight/obesity. | The prevalence of undernutrition is usually attributed to long-term relative physical growth retardation, physiological and developmental delays, impaired immune function and reduced cognitive functions. |
| [30]<br>Egypt | To assess the nutritional status, and identify the socio-demographic and lifestyle factors affecting it among rural school children.                  | Cross-sectional survey      | Among rural school children  | 736  | Children with poor poultry consumption and those skipping breakfast were at risk; irregular work of the father, large family size, and low socio-economic standard were also some of the risk factors.                               |                                                                                                                                                                                                             |
| [31]<br>India | To assess the nutritional status of school-going tribal children using anthropometric indices.                                                        | Cross-sectional survey      | School-going tribal children | 1221 | Children who were from poor homes were at risk. Children who lack nutritious food were also at risk.                                                                                                                                 |                                                                                                                                                                                                             |
| [32]<br>Egypt | To determine the nutritional status and dietary habits of school-aged children (6–12 years) attending public (non-fee                                 | Cross-sectional descriptive | School-aged children         | 288  | Children with large family size, low-income earners and low-level of education parents were at risk.                                                                                                                                 | Health problems due to miserable nutritional status in school-aged children are among the most common causes of low school enrolment, high absenteeism, early                                               |

|                       |                                                                                                                                                                             |                                    |                         |     |                                                                                                                       |                                                                                                           |                                                                                                                                                                                                                                                                                 |
|-----------------------|-----------------------------------------------------------------------------------------------------------------------------------------------------------------------------|------------------------------------|-------------------------|-----|-----------------------------------------------------------------------------------------------------------------------|-----------------------------------------------------------------------------------------------------------|---------------------------------------------------------------------------------------------------------------------------------------------------------------------------------------------------------------------------------------------------------------------------------|
|                       | paying—NFP) and private (fee paying—FP) primary schools.                                                                                                                    |                                    |                         |     |                                                                                                                       |                                                                                                           | dropout and unsatisfactory classroom performance                                                                                                                                                                                                                                |
| [33]<br>2016<br>India | To assess the nutritional status of 6–14-year-old school-going children and the association among socio-economic factors, living conditions and children's under-nutrition. | Cross-sectional descriptive        | School-going children   | 100 | Low level of parent's education, large family size, and poor social economic status of parents kept children at risk. | Excessive weight gain later in childhood increases the risk of nutrition-related chronic diseases.        | Poor health and nutritional status among school-going children may contribute to high rate of school dropout, absenteeism, and poor academic performance. Hungry school children tend to be nervous, irritable, disinterested and unable to fully concentrate in the classroom. |
| [34]<br>Karnataka     | To evaluate the level of malnutrition and the impact of households on the nutritional status of school children in a rural area.                                            | Cross-sectional descriptive survey | School children         | 270 | Poor socio-economic status of mothers put their children at risk, children whose mothers has lower or no education    |                                                                                                           |                                                                                                                                                                                                                                                                                 |
| [35]<br>India         | To evaluate the prevalence of vitamin A deficiency among the primary school children in relation to socio-economic status.                                                  | Cross-sectional study              | Primary school children | 600 | Lower socio-economic class were at risk                                                                               | Vitamin A deficiency was observed in students, among them some had conjunctival xerosis and Bitot's spot. |                                                                                                                                                                                                                                                                                 |
| [36]<br>Pakistan      | To explore the nutritional status of school-going children.                                                                                                                 | Cross-sectional study              | School-going children,  | 571 | Children who live in urban slums areas were at risk.                                                                  |                                                                                                           |                                                                                                                                                                                                                                                                                 |

|                       |                                                                                                                  |                                       |                                            |     |                                                                                                                                                                                                                                                                                                                              |
|-----------------------|------------------------------------------------------------------------------------------------------------------|---------------------------------------|--------------------------------------------|-----|------------------------------------------------------------------------------------------------------------------------------------------------------------------------------------------------------------------------------------------------------------------------------------------------------------------------------|
| [37]<br>Pakistan      | To find the impact of socio-economic factors on nutritional status in primary school children.                   | Cross sectional and descriptive study | Primary school children                    | 161 | Children of family living in poverty, with low literacy rate, of large families, and experiencing food insecurity were at risk                                                                                                                                                                                               |
| [38]<br>2019<br>Nepal | To find out the prevalence and associated factors of malnutrition among school-going adolescents.                | Descriptive cross-sectional           | Among school-going adolescents             | 510 | Adolescents living in joint families were at risk; family with no earning status were also at risk. Male adolescents were found to be more at risk of being overweight and obese than female adolescents.                                                                                                                    |
| [39]<br>Sri Lanka     | To determine socio-economic factors associated with nutritional status among children in plantation communities. | Cross-sectional                       | Among pre-school and school-going children | 547 | Maternal employment, high number of siblings, high birth orders and female children were significantly associated with undernutrition among pre-school children, while living in small houses, large number of family members, low monthly income, and maternal employment were significantly associated with undernutrition |



|                  |                                                                                                                                                                                            |                        |                               |     |                                                                                                                                                                                                                          |                                                                                                                                                       |
|------------------|--------------------------------------------------------------------------------------------------------------------------------------------------------------------------------------------|------------------------|-------------------------------|-----|--------------------------------------------------------------------------------------------------------------------------------------------------------------------------------------------------------------------------|-------------------------------------------------------------------------------------------------------------------------------------------------------|
|                  |                                                                                                                                                                                            |                        |                               |     | among school children.                                                                                                                                                                                                   |                                                                                                                                                       |
| [40]<br>Nigeria  | To determine the prevalence of stunting, thinness; vitamin A and iron deficiencies among adolescent students and to determine factors that are associated with these nutritional problems. | Cross-sectional study  | Among adolescent students     | 400 | Households with low income were more at risk to be vitamin-A-deficient.                                                                                                                                                  | VAD has been associated with anemia. Inadequate dietary intake, parasitic infections and menstrual losses are major causes of iron deficiency anemia. |
| [41]<br>Nigerian | To determine the prevalence and predictors of under-nutrition among school children.                                                                                                       | Cross-sectional        | School children               | 450 | Children with zinc deficiency and vitamin A deficiency were at risk; household income, weekly food expenditure, and age of the child were some of the other risk factors.                                                |                                                                                                                                                       |
| [42]<br>Ghana    | To investigate the determinants of malnutrition among pupils attending public and private schools                                                                                          | Cross-sectional survey | Among pupils attending school | 633 | Family with lower socioeconomic status were at risk; locations of pupils (rural versus urban), guardian's occupation, and number of meals consumed in a day and the type of school attended were the other risk factors. | Malnutrition is the cause of low school enrolment, high absenteeism, early dropout and unsatisfactory classroom performance in school children        |
| [43]<br>India    | To assess the socio-economic                                                                                                                                                               | Cross-sectional        | Among school children         | 465 | Socio-demographic factors such as caste,                                                                                                                                                                                 |                                                                                                                                                       |

|               |                                                                                                                                                                                        |                        |                               |      |                                                                                                                                                                                                                                                                                                                                                                                                                                                                 |
|---------------|----------------------------------------------------------------------------------------------------------------------------------------------------------------------------------------|------------------------|-------------------------------|------|-----------------------------------------------------------------------------------------------------------------------------------------------------------------------------------------------------------------------------------------------------------------------------------------------------------------------------------------------------------------------------------------------------------------------------------------------------------------|
|               | predisposing factors of mal-nutrition among school children.                                                                                                                           |                        |                               |      | and socio-economic factors such as parental education, employment and socio-economic conditions were the risk factors.                                                                                                                                                                                                                                                                                                                                          |
| [44]<br>India | To determine the prevalence of underweight, overweight, and obesity among school-going adolescent girls along with dietary and physical activity-related factors associated with them. | Cross-sectional study  | School-going adolescent girls | 2400 | Girls belonging to middle- and upper-socio-economic strata were more at risk of obesity. Adolescent females who belong to nuclear families were at risk of overweight. Adolescents who reside in urban areas were more at risk of overweight and obesity compared to rural one. Those with their father's education of middle school and above were more at risk of overweight and obese as compared to the adolescents with father's education at the maximum. |
| [45]<br>Egypt | To determine the nutritional status and dietary habits of                                                                                                                              | Cross sectional survey | School Children               | 1100 | Low level of both parents' education and large family size were the risk factors.                                                                                                                                                                                                                                                                                                                                                                               |

|                  |                                                                                                                       |                       |                                                      |        |                                                                                                                                                                                                                               |
|------------------|-----------------------------------------------------------------------------------------------------------------------|-----------------------|------------------------------------------------------|--------|-------------------------------------------------------------------------------------------------------------------------------------------------------------------------------------------------------------------------------|
|                  | school children.                                                                                                      |                       |                                                      |        |                                                                                                                                                                                                                               |
| [46]<br>India    | To determine the burden and possible predictors of malnutrition among primary and upper-primary school-aged children. | Cross-sectional       | Among primary and upper-primary school-aged children | 24,108 | Subjects with three or more siblings were at risk and unemployed father, illiterate mother or father and those who had lost their mothers were also at risk.<br>Children with leave in rural areas were also at risk.         |
| [47]<br>Ethiopia | To assess the prevalence of under-nutrition and its associated factors among children.                                | Cross-sectional       | Among children                                       | 459    | Children with large family size were at risk.<br>Children who had fewer frequent meals were also at risk, and those within the age of 10 to 14 years were also at risk; male children were more at risk than female children. |
| [48]<br>India    | To estimate the prevalence and risk factors of malnutrition among school-going children                               | Cross-sectional study | School-going children                                | 150    | Children from illiterate mothers were at risk, children who were experiencing lack of healthy sustenance from a joint family were also at risk, and female students were more at risk                                         |

|               |                                                                                                                                                                              |                                     |                                  |      |                                                                                                                                                                                                                                      |                                                                                                                                                                 |                                                                                                                               |
|---------------|------------------------------------------------------------------------------------------------------------------------------------------------------------------------------|-------------------------------------|----------------------------------|------|--------------------------------------------------------------------------------------------------------------------------------------------------------------------------------------------------------------------------------------|-----------------------------------------------------------------------------------------------------------------------------------------------------------------|-------------------------------------------------------------------------------------------------------------------------------|
|               |                                                                                                                                                                              |                                     |                                  |      |                                                                                                                                                                                                                                      | than male students.                                                                                                                                             |                                                                                                                               |
| [49]<br>India | The study was carried out to assess the nutritional status of school children between the ages of 6 of 12 years.                                                             | Cross-sectional study               | School-going children            | 284  | Children whose parents are illiterate stand the chance of being malnourished.                                                                                                                                                        |                                                                                                                                                                 |                                                                                                                               |
| [50]<br>Nepal | To study the nutritional status assessment of adolescent school children.                                                                                                    | Cross-sectional study               | Adolescent school-going children | 192  | Families who have difficulty in accessing food. Low level of mother's education.                                                                                                                                                     |                                                                                                                                                                 | It can cause cognitive effects.                                                                                               |
| [51]<br>India | To estimate the magnitude of malnutrition among school-going children in a slum area of Kolkata and to elicit the association of nutritional status with parental education. | Cross-sectional observational study | School-going children            | 508  | Children with parents who have poor educational backgrounds.                                                                                                                                                                         |                                                                                                                                                                 |                                                                                                                               |
| [52]<br>India | To explore protein energy malnutrition related learning disabilities in school-going children in relation to the Prakrit.                                                    | Cross-sectional design              | School-going children            | 1520 | Children with inadequate dietary intake, anorexia, malabsorption, micro-nutrient deficiency, early cessation of breast feeding, maternal illiteracy, maternal malnutrition, and poverty were at risk of protein energy malnutrition. | Malnutrition was responsible for the susceptibility towards a variety of physical and mental diseases including the development of various infectious diseases. | Poor cognitive function, particularly memory and learning performance, was found to be associated with malnourished children. |

|                      |                                                                                                                                          |                                   |                         |     |                                                                                                                                                                                                                                                                                                   |                                                                                                                              |                                                                                                                    |
|----------------------|------------------------------------------------------------------------------------------------------------------------------------------|-----------------------------------|-------------------------|-----|---------------------------------------------------------------------------------------------------------------------------------------------------------------------------------------------------------------------------------------------------------------------------------------------------|------------------------------------------------------------------------------------------------------------------------------|--------------------------------------------------------------------------------------------------------------------|
| [53]<br>Pakistan     | To assess the nutritional assessment of the primary school children in Abbottabad.                                                       | Descriptive cross-sectional study | Primary school children | 200 | Children with lower socioeconomic status were at risk.                                                                                                                                                                                                                                            | Children of well-serviced fathers and qualified mothers were healthy, more intelligent and practiced good hygiene.           | Children attending a private school who have better nutritional status perform better than public school children. |
| [54]<br>Ghana        | To determine the prevalence of undernutrition and overweight/obesity and its associated factors among children.                          | Cross-sectional study             | School children         | 423 | Children whose household used water from non-portable sources were at risk of being undernourished.<br>Children whose mothers had attained formal education were at risk of overweight/obesity.<br>Children who consumed beverages between meals per day were also at risk of overweight/obesity. |                                                                                                                              |                                                                                                                    |
| [55]<br>Burkina Faso | To determine the prevalence of undernutrition and its risk factors among schoolchildren in Burkina Faso before the start of the project. | Cross-sectional                   | School children         | 455 | Older-age group (12–14 years) were at risk compared to those younger than 11 years, and children with middle or lower hygiene categories were also at risk.                                                                                                                                       | WASH, health education and nutritional interventions will be implemented with the goal of improving schoolchildren's health. |                                                                                                                    |
| [56]<br>Egypt        | To assess the level of malnutrition and associated factors among                                                                         | Cross-sectional study             | School children         | 736 | Increasing age, reduced poultry consumption, and skipping breakfast                                                                                                                                                                                                                               | Prevalence of obesity was significantly higher in younger age group                                                          |                                                                                                                    |

|                    | school children.                                                                                                                                                                                                                                                                                                           |                       |                       |      | were associated risk factors.                                                                      | compare with older age.                                                                             |
|--------------------|----------------------------------------------------------------------------------------------------------------------------------------------------------------------------------------------------------------------------------------------------------------------------------------------------------------------------|-----------------------|-----------------------|------|----------------------------------------------------------------------------------------------------|-----------------------------------------------------------------------------------------------------|
| [57]<br>Bangladesh | To propose a new approach to solve nutritional deficiency of school-going children in Bangladesh.<br>● To determine the prevalence of under-weight, stunting and wasting in school-going urban and slum children of Chittagong, Bangladesh.<br>● To analyze factors correlated with malnutrition in school-going children. | Cross-sectional study | School-going children | 50   | Children living in slum areas were at risk.                                                        |                                                                                                     |
| [58]<br>Pakistan   | To determine the frequency of nutritional status and socio-demographic factors influencing under nutrition among school children of rural Islamabad.                                                                                                                                                                       | Cross-sectional study | Among school children | 1710 | Children in urban areas are at risk of having greater weight and height than those in rural areas. |                                                                                                     |
| [59]<br>India      | To assess the various morbidities and nutritional status among school children.                                                                                                                                                                                                                                            | Cross-sectional study | Among school children | 714  | Children with poor personal hygiene.                                                               | Some of the common conditions suffered by these children include pallor, myopia, and dental caries. |

|                                                                    |                                                                                                                                                               |                                    |                             |       |                                                                                                                                                    |                                                                                                                                                                                                                                            |                              |
|--------------------------------------------------------------------|---------------------------------------------------------------------------------------------------------------------------------------------------------------|------------------------------------|-----------------------------|-------|----------------------------------------------------------------------------------------------------------------------------------------------------|--------------------------------------------------------------------------------------------------------------------------------------------------------------------------------------------------------------------------------------------|------------------------------|
| [60]<br>Bangladesh                                                 | To identify the sources of information and corresponding knowledge level on nutrition among school-going adolescents.                                         | Cross-sectional survey             | School-going adolescent     | 855   | Those who source information online, those with low information on the nutrition facts' panel, and those depending on family members were at risk. |                                                                                                                                                                                                                                            |                              |
| [61]<br>Western Nepal                                              | To find the prevalence of malnutrition among school children 4-14 years old and the effect of socio-demographic characteristic of mothers on child nutrition. | Descriptive Cross-sectional survey | School children             | 789   | Children whose mothers had a poor knowledge of diet, and children whose mothers were laborers were at risk.                                        | Lowered resistance to infection (diarrheal diseases and respiratory infections), faltering growth.                                                                                                                                         | Diminished learning ability. |
| [62]<br>Benin, Djibouti, Egypt, Ghana, Malawi, Mauritania, Morocco | To evaluate the prevalence of underweight, overweight, and obesity as well as associated risk factors among school-going adolescents.                         | Cross-sectional study              | School-going adolescent     | 25815 | Households with food insecurity, adolescents who consume fast food and soft drinks, adolescents who do not do any physical activities.             |                                                                                                                                                                                                                                            |                              |
| [63]<br>Pakistan                                                   | To assessment of nutritional status among school-going children through their dietary intake.                                                                 | Cross-sectional study              | Among school-going children | 200   | Inadequate consumption of food groups by children, inadequate milk intake.                                                                         | Due to low consumption of dairy products, children are at risk of developing osteoporosis on later age. Calcium is required for bones growth and height. Consumed candies/chocolates daily, which is the main reason for developing dental |                              |

|                          |                                                                                                                                                                                                                                                  |                                   |                                                                                  |     |                                                                                                |                                                                                                                        |                                                                                                                   |
|--------------------------|--------------------------------------------------------------------------------------------------------------------------------------------------------------------------------------------------------------------------------------------------|-----------------------------------|----------------------------------------------------------------------------------|-----|------------------------------------------------------------------------------------------------|------------------------------------------------------------------------------------------------------------------------|-------------------------------------------------------------------------------------------------------------------|
|                          |                                                                                                                                                                                                                                                  |                                   |                                                                                  |     |                                                                                                | carries and childhood obesity.                                                                                         |                                                                                                                   |
| [64]<br>Kenya            | To determine the household food and nutrition security among households with school-going children.                                                                                                                                              | Cross-sectional Study             | School-going children.                                                           | 386 | Children who do not consume livestock products are at risk.                                    | It affects their physical and cognitive development.                                                                   | It affects their physical and cognitive development leading to low-class attendance hence poor school performance |
| [65]<br>2019<br>Botswana | To determine the effect of the Botswana School Feeding Programme (SFP) (all government schools) on the nutritional status of primary school children in the South-east District when compared to non-beneficiaries of the SFP (private schools). | Comparative cross-sectional study | Among primary school children                                                    | 392 | Children who have inadequate supply of energy, protein, vitamin A and calcium were at risk.    |                                                                                                                        |                                                                                                                   |
| [66]<br>Ghana            | To determine the Nutrition intakes and nutritional status of school-aged children in Ghana school-aged children                                                                                                                                  | Comparative cross-sectional       | School-aged children                                                             | 425 | Children with low intake of protein, zinc, iron, calcium, vitamin A and vitamin C were at risk | At least 3 out of 10 school-age children were anaemic                                                                  |                                                                                                                   |
| [67]<br>Ghana            | To assess the influence of Ghana School Feeding Programme on nutritional status of school children                                                                                                                                               | Case control study                | Participating and non-participating pupils in the Ghana School Feeding Programme | 234 | inadequate food intake of children, poor dietary quality and increased morbidity in children   | It may result in morbidity and fewer opportunities for economic development, adversely affect their mental development | poor academic performance OR adversely affect their cognitive                                                     |



|               |                                                                                                                            |                        |                            |     |                                                                                                                                                                                                                                                                                                                                                                                        |                                                                                                                                                                                                                                                        |
|---------------|----------------------------------------------------------------------------------------------------------------------------|------------------------|----------------------------|-----|----------------------------------------------------------------------------------------------------------------------------------------------------------------------------------------------------------------------------------------------------------------------------------------------------------------------------------------------------------------------------------------|--------------------------------------------------------------------------------------------------------------------------------------------------------------------------------------------------------------------------------------------------------|
| [68]<br>Kenya | To assess the nutrition status and associated risk factors of children in selected public primary schools                  | Cross-sectional design | Among school-aged children | 208 | Children who had diarrhoea, colds/coughs are at risk. Children who took inadequate energy food are risk. Those who took less than four varieties of food.                                                                                                                                                                                                                              | Incidence of diarrhoea, colds/coughs vomiting, fever and skin rashes. increased due to malnutrition                                                                                                                                                    |
| [69]<br>India | To study the diet and physical activity factors influencing overweight and obesity in school-aged children.                | Cross-sectional study  | School-aged children       | 400 | Children who have the habit of eating in between meals, Children who are having dinner as the heaviest meal of the day, Children who consume more than three meals in a day, children who have the habit of not playing outdoor games, Not participating in household activities, Children who use vehicular transport to school, children who watch TV for more than 3 hours per day. | Risk of developing non-communicable diseases in adult life.                                                                                                                                                                                            |
| [70]<br>Iraq  | To assess the nutritional status and nutritional habit of primary school children and to relate it with their Intelligence | Cross sectional survey | Primary school children    | 529 | Children with bad food habits, and children skipping breakfast were also at risk.                                                                                                                                                                                                                                                                                                      | Poor nutritional status can adversely affect brain function and impact cognition and behavior. Malnutrition among children is still a public health issue in Iraq and it affects the children's cognitive function and academic performance at school. |

|                  | Quotient (IQ) score using standardized tools.                                                                                     |                        |                                                      |      |                                                                                               |                                                                                                                                        |                                                                                                                                                          |  |
|------------------|-----------------------------------------------------------------------------------------------------------------------------------|------------------------|------------------------------------------------------|------|-----------------------------------------------------------------------------------------------|----------------------------------------------------------------------------------------------------------------------------------------|----------------------------------------------------------------------------------------------------------------------------------------------------------|--|
| [71]<br>Ethiopia | To assess adolescent nutritional status and associated factors in secondary and preparatory school students.                      | Cross-sectional study  | Secondary and preparatory school adolescent students | 572  | Adolescents who consume foods such as plus, legumes, and lentils were statistically at risks. |                                                                                                                                        |                                                                                                                                                          |  |
| [72]<br>Senegal  | To assess the anthropometric and micronutrient status of children from state schools in the Dakar area.                           | Cross-sectional survey | School children                                      | 604  | Children with deficiency vitamin A, zinc, iodine and iron were at risk of malnourishment.     | Iodine, iron and folic acid micronutrient deficiencies affect the development of the brain and cognitive functions of school children. | Deficiencies of vitamin A and zinc are associated with different scenarios affecting school performance, such as absenteeism due to increased morbidity. |  |
| [73]<br>Ghana    | To assess and compare the nutritional status of boarding and non-boarding pupils aged 8 to 10 years.                              | Cross-sectional study  | School-aged children                                 | 124  | Children with micronutrients were found to be at risk.                                        | About 72% of the children were found to be anemic due to iron deficiency.                                                              |                                                                                                                                                          |  |
| [74]<br>Nigeria  | To assess the physical growth and nutritional status of school children.                                                          | Cross-sectional study  | School-going children                                | 2616 | Children who are obese and overweight are at risk.                                            | Overweight and obesity have also been linked to increased risk of cardiovascular and pulmonary diseases.                               | Chronic undernutrition in older children is linked to slower cognitive development, poor school attendance, high school withdrawal rate.                 |  |
| [75]<br>India    | To evaluate the extent of underweight and stunting present among 1–12 year-old children belonging to a low socio-economic status. | Cross-sectional study  | Pre-adolescent children of low socio-economic class  | 1206 | Children with family with low income.                                                         |                                                                                                                                        |                                                                                                                                                          |  |

|                       |                                                                                                                                                               |                                   |                       |        |                                                                                                                                                                                                                                                                     |
|-----------------------|---------------------------------------------------------------------------------------------------------------------------------------------------------------|-----------------------------------|-----------------------|--------|---------------------------------------------------------------------------------------------------------------------------------------------------------------------------------------------------------------------------------------------------------------------|
| [76]<br>India         | To identifying the commonly prevailing health and nutritional disorders in school-going children is essential to initiate appropriate public health measures. | Cross-sectional prospective study | School-going children | 28,256 | Worm infestation was the commonest morbidity found in most children, followed closely by upper respiratory tract infection and dental caries. Other diseases encountered were skin disorders, ear discharge, lower respiratory tract infections and abdominal pain. |
| [77]<br>Pakistan      | To assess the prevalence nutritional status and correlation between nutritional status of students and the academic performance of school-going children.     | Cross-sectional study             | School-going children | 400    | Low level of educational performance in children who are malnourished.                                                                                                                                                                                              |
| [78]<br>India         | To determine the relationship between nutritional status and academic achievement of school children.                                                         | Cross-sectional study             | School children       | 135    | There was a positive and highly significant difference found between nutritional status with academic achievement; hence, increasing the nutritional status of children in turn increases their academic achievement.                                               |
| [79]<br>2017<br>India | To assess the association of malnutrition with scholastic performance among 8–12-year children in two selected                                                | Cross-sectional study             | School-going children | 384    | It was found that poor scholastic performance was significantly associated with underweight, stunting and BMI.                                                                                                                                                      |

|                    |                                                                                                                                        |                 |                              |     |                                                                                                                                                                                     |                                                                                                                                                                                                                                                                                                                                                  |
|--------------------|----------------------------------------------------------------------------------------------------------------------------------------|-----------------|------------------------------|-----|-------------------------------------------------------------------------------------------------------------------------------------------------------------------------------------|--------------------------------------------------------------------------------------------------------------------------------------------------------------------------------------------------------------------------------------------------------------------------------------------------------------------------------------------------|
|                    | private schools in Meerut. To assess the association of malnutrition with scholastic performance among selected school-going children. |                 |                              |     |                                                                                                                                                                                     |                                                                                                                                                                                                                                                                                                                                                  |
| [80]<br>Madagascar | To estimate the possible causalities between children's nutritional status and academic performances in rural Madagascar.              | Cross-sectional | Among primary schoolchildren | 399 |                                                                                                                                                                                     | School attendance rates among children not stunted and among those not underweight were significantly higher than among those stunted and among those underweight, respectively. No significant difference was identified in attendance rates between those who were thin and not thin and between those who were overweight and not overweight. |
| [81]<br>Madagascar | To estimate prevalence of malnutrition among schoolchildren aged 5-14 years.                                                           | Cross-sectional | School children              | 393 | Children between the ages of 5 and 14 years were at risk, children in large household were also at risk, and children who do not consume adequate animal protein were also at risk. |                                                                                                                                                                                                                                                                                                                                                  |

|                  |                                                                                                                                                                     |                        |                                    |     |                                                                          |
|------------------|---------------------------------------------------------------------------------------------------------------------------------------------------------------------|------------------------|------------------------------------|-----|--------------------------------------------------------------------------|
| [82]<br>Nigeria  | To assess the iron, zinc and copper status of primary school-at-tending children.                                                                                   | Cross-sectional survey | Primary school-at-tending children | 200 |                                                                          |
| [83]<br>India    | To assess nutritional status of weight for age, height for age and weight for height based on anthropometric measurements.                                          | Cross-sectional study  | Among school-going boys and girls  | 446 |                                                                          |
| [84]<br>Nepal    | To assess the nutritional status in terms of prevalence of underweight, stunting and thinness among rural school-going children.                                    | Cross-sectional study  | Rural school-going children        | 438 |                                                                          |
| [87]<br>Ethiopia | assessed the magnitude of adolescents under nutrition and its associated factors among primary and secondary public school                                          | Cross-sectional        | Adolescents                        | 411 |                                                                          |
| [88]<br>Nigeria  | The objective of this research was to carry out the anthropometric measurements of the pupils; predict the nutritional status of the school children; carry out the | Experimental study     | Pupils in a public primary school  | 160 | Children who have low intake of vitamins from school meals were at risk. |

|               |                                                                                                                                                                                                               |                       |                       |     |                                                                                     |
|---------------|---------------------------------------------------------------------------------------------------------------------------------------------------------------------------------------------------------------|-----------------------|-----------------------|-----|-------------------------------------------------------------------------------------|
|               | nutrient analysis of the school meals; and calculate the nutrient intake therefrom and then compare it with Recommended Dietary Allowance (RDA) for children.                                                 |                       |                       |     |                                                                                     |
| [89]<br>India | To assess the prevalence of malnutrition among under-five children of the Kadukuruba tribe and socio-demographic factors associated with it.                                                                  | Cross-sectional study | Under-five children   | 101 |                                                                                     |
| [91]<br>India | To determine the nutritional status by using four commonly used anthropometric indicators.                                                                                                                    | Cross-sectional       | Among school children | 200 |                                                                                     |
| [92]<br>Ghana | To compare the nutritional status of SAC enrolled in schools with the SFP and SAC enrolled in schools without the SFP in place for the purpose of identifying which group has the higher rate of malnutrition | Cross-sectional       | School children       | 359 | Sex of pupil, age of pupil, area of residence and community type were risk factors. |

|                  |                                                                                                              |                       |                             |     |                                                                                                      |
|------------------|--------------------------------------------------------------------------------------------------------------|-----------------------|-----------------------------|-----|------------------------------------------------------------------------------------------------------|
| [93]<br>India    | To assess the overall prevalence of under nutrition using composite index of anthropometric failure.         | Cross sectional study | Among school-going children | 360 |                                                                                                      |
| [94]<br>Pakistan | To understand the different factors which affect malnutrition on school-going children in rural communities. | Cross-sectional       | School-going children       | 85  | Children with low family incomes, low level of family education and poor eating habits were at risk. |

Some cells were left blank because the studies included did not have information to fill such cells.
